# Supplementary material for: The Effectiveness of School-Based Skills-Training Programs Reducing Performance or Social Anxiety: Two Randomized Controlled Trials
Source: Springer Nature journal article supplement (doi:10.1007/s10566-023-09736-x), 2023-02-04
Supplement: MOESM1 [file 10566_2023_9736_MOESM1_ESM.pdf]

The Effectiveness of School-Based Skills-Training Programs Reducing Performance or Social Anxiety: Two  
Randomized Controlled Trials.

Authors: Amanda W. G. van Loon <sup>a</sup>, Hanneke E. Creemers <sup>b</sup>, Simone Vogelaar <sup>c</sup>, Anne C. Miers <sup>c</sup>, Nadira Saab <sup>d</sup>, P. Michiel Westenberg <sup>c</sup> & Jessica J. Asscher <sup>a</sup>

Corresponding author: Amanda W. G. van Loon, Child and Adolescent Studies (CAS), Utrecht University,  
Heidelberglaan 1, 3584 CS Utrecht, the Netherlands; Email: [a.w.g.vanloon@uu.nl](mailto:a.w.g.vanloon@uu.nl); Telephone number: +3130-  
2534801.

Journal: Child & Youth Care Forum

**Supplementary Table 1**

| Before the COVID-19 pandemic ( <i>N</i> = 144) |                       |                       | After the start of the COVID-19 pandemic ( <i>N</i> = 217) |                          |                |                                           |
|------------------------------------------------|-----------------------|-----------------------|------------------------------------------------------------|--------------------------|----------------|-------------------------------------------|
| School year                                    | School year           | Time T1               | School year                                                | School year              | Time T1        | Registered in                             |
| 2018/2019                                      | 2019/2020             |                       | 2020/2021<br>(restarted)                                   | 2020/2021<br>(postponed) |                | September 2020<br>( <i>N</i> = 36, 16.6%) |
| <i>N</i> (% of total)                          | <i>N</i> (% of total) |                       | <i>N</i> (% of total)                                      | <i>N</i> (% of total)    |                | <i>N</i> (% of school)                    |
| School 1                                       | 50 (34.7)             | February 2019         | 40 (18.4)                                                  |                          | September 2020 | 4 (10.0)                                  |
| School 2                                       | 3 (2.1)               | February / March 2019 | 6 (2.8)                                                    |                          | September 2020 | 0 (0.0)                                   |
| School 3                                       | 36 (25.0)             | May 2019              | Dropped out                                                |                          |                |                                           |
| School 4                                       | 20 (13.9)             | December 2019         |                                                            |                          |                |                                           |
| School 5                                       | 35 (24.3)             | January 2020          |                                                            |                          |                |                                           |
| School 6                                       |                       |                       | 111 (51.2)                                                 |                          | October 2020   | 2 (1.8)                                   |
| School 7                                       |                       |                       | 19 (8.8)                                                   |                          | October 2020   | 1 (5.3)                                   |
| School 8                                       |                       |                       |                                                            | 10 (4.6)                 | September 2020 | 7 (70.0)                                  |
| School 9                                       |                       |                       |                                                            | 31 (14.3)                | October 2020   | 22 (71.0)                                 |

*Overview of Participating Schools, Final Number of Participants, and Data Collection Cohorts*
